# Supplementary material for: Thermal stability of TPA template and size-dependent selectivity of uncalcined TS-1 supported Au catalyst for propene epoxidation with H2 and O2
Source: Royal Society of Chemistry journal article supplement (doi:10.1039/c6ra05772a), 2016-01-01
Supplement: c6ra05772a1.pdf [file c6ra05772a1.pdf]

## Electronical Supporting Information

### **Thermal stability of TPA template and size- dependent selectivity of uncalcined TS-1 supported Au catalyst for propene epoxidation with H<sub>2</sub> and O<sub>2</sub>**

X. Feng<sup>a\*</sup>, D. Chen<sup>c</sup> and X.G. Zhou<sup>b\*</sup>

*<sup>a</sup> State Key Laboratory of Heavy Oil Processing, China University of  
Petroleum (East China), Qingdao 266580, China.*

*<sup>b</sup> State Key Laboratory of Chemical Engineering, East China University  
of Science and Technology, 130 Meilong Road, Shanghai 200237, China.*

*<sup>c</sup> Department of Chemical Engineering, Norwegian University of Science  
and Technology, Trondheim 7491, Norway.*

**Table 1** The structural properties of TS-1-B and Au/TS-1-B samples

| Sample    | $S_{\text{BET}}$ ( $\text{m}^2 \cdot \text{g}^{-1}$ ) | $V_{\text{MP}}^{\text{a}}$ ( $\text{cm}^3 \cdot \text{g}^{-1}$ ) | $V_{\text{P}}^{\text{b}}$ ( $\text{cm}^3 \cdot \text{g}^{-1}$ ) |
|-----------|-------------------------------------------------------|------------------------------------------------------------------|-----------------------------------------------------------------|
| TS-1-B    | 45                                                    | 0.01                                                             | 0.05                                                            |
| Au/TS-1-B | 47                                                    | 0.01                                                             | 0.05                                                            |

<sup>a</sup> Micropore volume ( $V_{\text{MP}}$ ) is estimated by t-plot method.

<sup>b</sup> Pore volume ( $V_{\text{P}}$ ) is evaluated from the adsorption isotherm at the relative pressure about 0.99.
